# Supplementary material for: Microwave assisted synthesis of fluorescent hetero atom doped carbon dots for determination of betrixaban with greenness evaluation
Source: Royal Society of Chemistry journal article supplement (doi:10.1039/d3ra00824j), 2023-01-01
Supplement: d3ra00824j1.pdf [file d3ra00824j1.pdf]

## **Microwave Assisted Synthesis of Fluorescent Hetero Atoms Doped Carbon Dots for Determination of Betrixaban with Greenness Evaluation**

Mariam S. El-Semary<sup>a</sup>, Ali A. El-Emam<sup>a</sup>, F. Belal<sup>b</sup>, Amal A. El-Masry<sup>a\*</sup>

<sup>a</sup> Department of Medicinal Chemistry, Faculty of Pharmacy, Mansoura University, 35516 Mansoura, Egypt.

<sup>b</sup> Department of Pharmaceutical Analytical Chemistry, Faculty of Pharmacy, Mansoura University, 35516 Mansoura, Egypt.

---

\*Corresponding author email address: [dr.Amal90@mans.edu.eg](mailto:dr.Amal90@mans.edu.eg)

Fax: +20 502200242 Tel.: +20 502200520

**Table S1 Robustness data of Betrixaban maleate (BTM)**

| <b>Parameters</b>                  | <b>Volume of buffer solution (mL)</b> |            |            | <b>pH of buffer solution</b> |             |             |
|------------------------------------|---------------------------------------|------------|------------|------------------------------|-------------|-------------|
|                                    | <b>1.8</b>                            | <b>2.0</b> | <b>2.2</b> | <b>11.8</b>                  | <b>12.0</b> | <b>12.2</b> |
| <b>% Recovery</b>                  | 100.33                                | 101.00     | 101.92     | 100.74                       | 101.00      | 101.92      |
| <b><math>\bar{X} \pm SD</math></b> | 101.08 $\pm$ 0.79                     |            |            | 101.22 $\pm$ 0.62            |             |             |
| <b>% Error</b>                     | 0.46                                  |            |            | 0.36                         |             |             |

**Table S2 Comparison between the performance of the evolved method and the other reported ones for determination of Betrixaban maleate (BTM)**

| Methods                                        | Conditions                                                                                                                                                                              | Linearity range ( $\mu\text{g/ml}$ ) | LOD ( $\mu\text{g/ml}$ ) | Reference   |
|------------------------------------------------|-----------------------------------------------------------------------------------------------------------------------------------------------------------------------------------------|--------------------------------------|--------------------------|-------------|
| RP-HPLC                                        | Cyano column, mobile phase: acetonitrile: methanol: water (35:35:30, v/v/v, pH 3.2) with UV detection at 240 nm.                                                                        | 0.20 – 20.0                          | 0.04                     | 4           |
| RP-HPLC                                        | C <sub>18</sub> column, mobile phase: water: acetonitrile (88: 12 v/v) using UV detection at wavelength of 272 nm.                                                                      | 70.0 – 210.0                         | 4.96                     | 5           |
| LC-MS/MS                                       | C <sub>18</sub> column, mobile phase A: (95% of 5 mM ammonium formate in water with 5% acetonitrile), mobile phase B: (100% acetonitrile).                                              | 0.004 – 1.0                          | 0.0003                   | 6           |
| Spectrophotometry                              | First derivative amplitude at 304 nm using methanol.<br>Difference absorbance ( $\Delta A$ ) at 335 nm in 0.1 M NaOH <i>versus</i> 0.1 M HCL.                                           | 1.0 – 20.0<br>8.0 – 80.0             | 0.23<br>0.91             | 7           |
| Quantitative proton nuclear magnetic resonance | The quantitative determination was based on the selective proton BTM signal at 3.87 ppm using DMSO- <i>d</i> <sub>6</sub> as deuterated solvent and phloroglucinol as internal standard | 100 - 8000                           | 19.0                     | 8           |
| Spectrofluorimetry                             | Using N,S-CDs probe based fluorescent sensor                                                                                                                                            | 0.568 - 56.8                         | 0.187                    | This method |
